# Supplementary material for: Inhibiting SARS-CoV-2 viral entry by targeting spike:ACE2 interaction with O-modified quercetin derivatives
Source: Royal Society of Chemistry journal article supplement (doi:10.1039/d4md00286e), 2024-01-01
Supplement: d4md00286e1.pdf [file d4md00286e1.pdf]

SUPPORTING INFORMATION

**Inhibiting SARS-CoV-2 Viral Entry by Targeting Spike:ACE2 Interaction  
with *O*-Modified Quercetin Derivatives**

Reuben James Z. Rosal,<sup>[a]</sup> Monissa C. Paderes\*<sup>[a]</sup>

<sup>[a]</sup>Institute of Chemistry, College of Science, University of the Philippines Diliman, Quezon  
City 1101 Philippines

This contains the NMR spectra and *in vitro* data of all the synthesized compounds.

|      |                                                                                                               |    |
|------|---------------------------------------------------------------------------------------------------------------|----|
| I.   | NMR Spectra                                                                                                   | 2  |
| II.  | Percent Inhibition of Quercetin and its Derivative<br>Against the SARS-CoV-2 S <sub>1</sub> :ACE2 Interaction | 19 |
| III. | Raw Data of the Toxicity Profiles of the <i>O</i> -<br>Modified Quercetin Derivatives                         | 22 |

## I. NMR Spectra

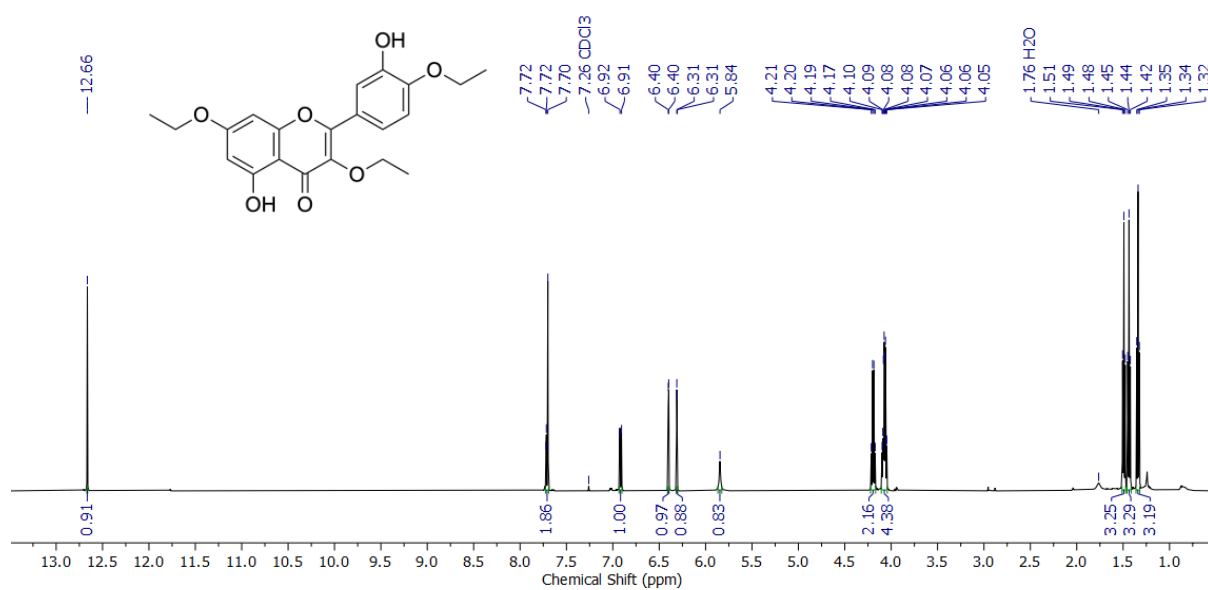

Figure S1. <sup>1</sup>H-NMR spectrum of compound 2a

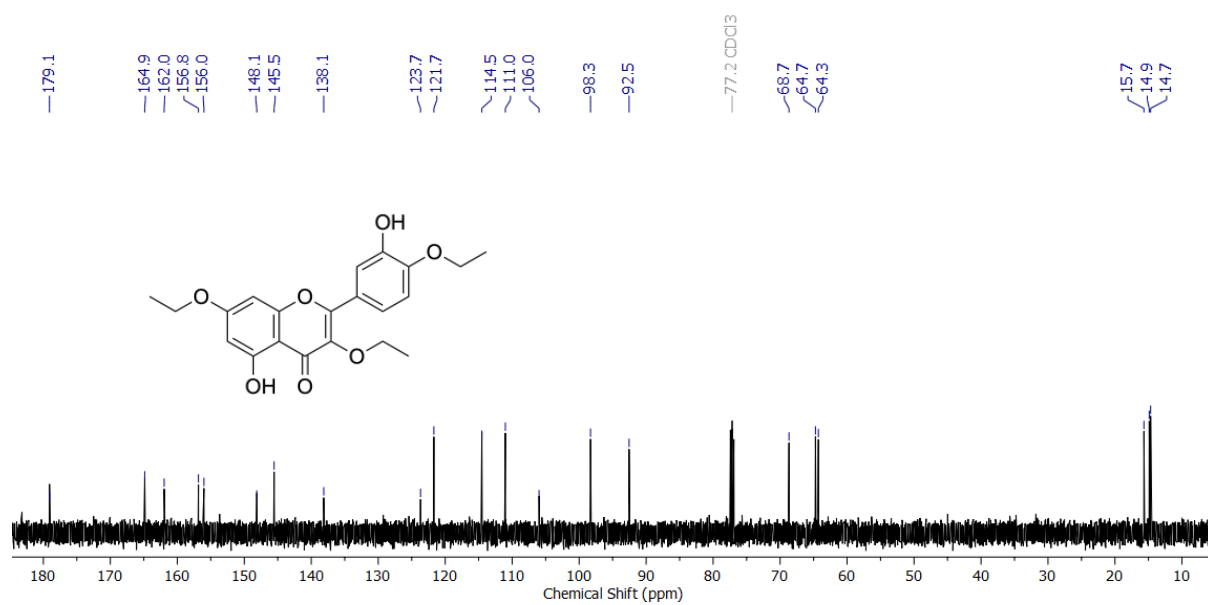

Figure S2. <sup>13</sup>C-NMR spectrum of compound 2a

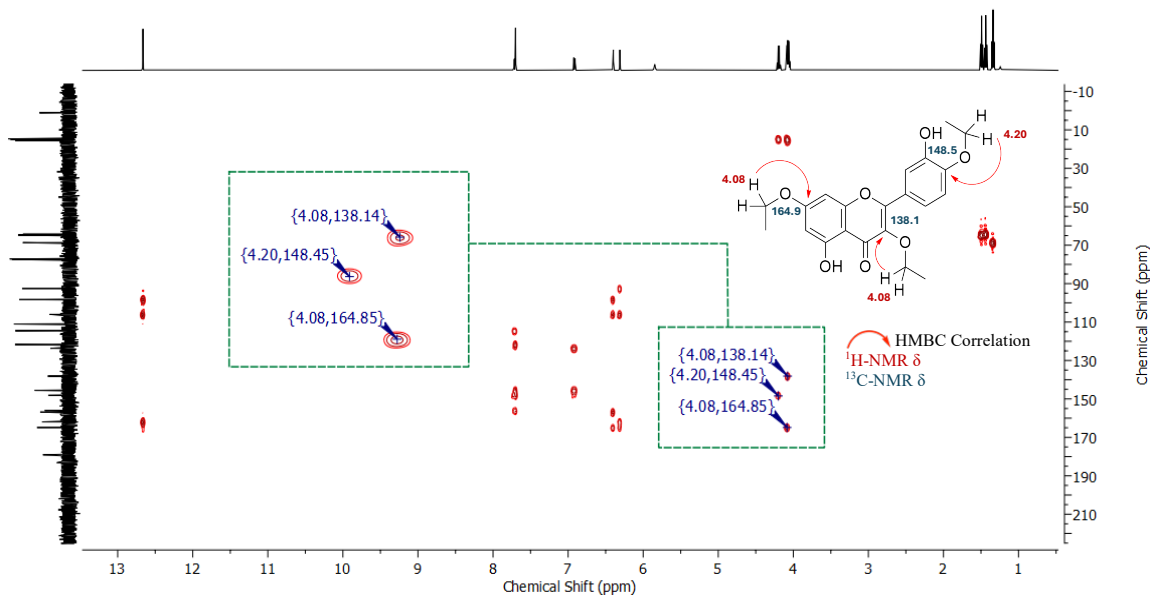

**Figure S3.** HMBC spectrum of compound 2a

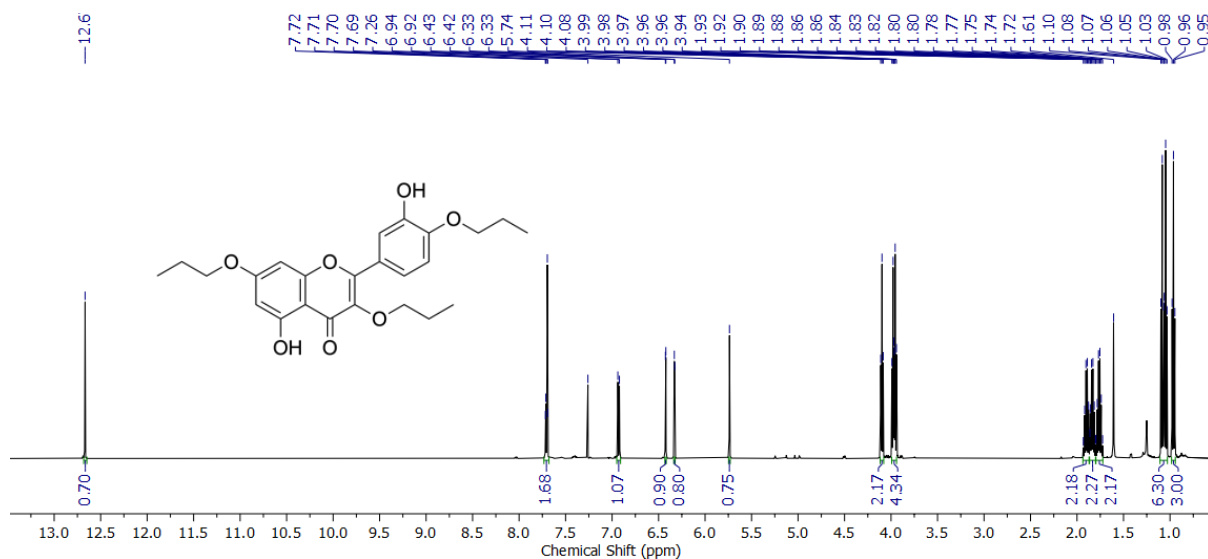

Figure S4. <sup>1</sup>H-NMR spectrum of compound 2b

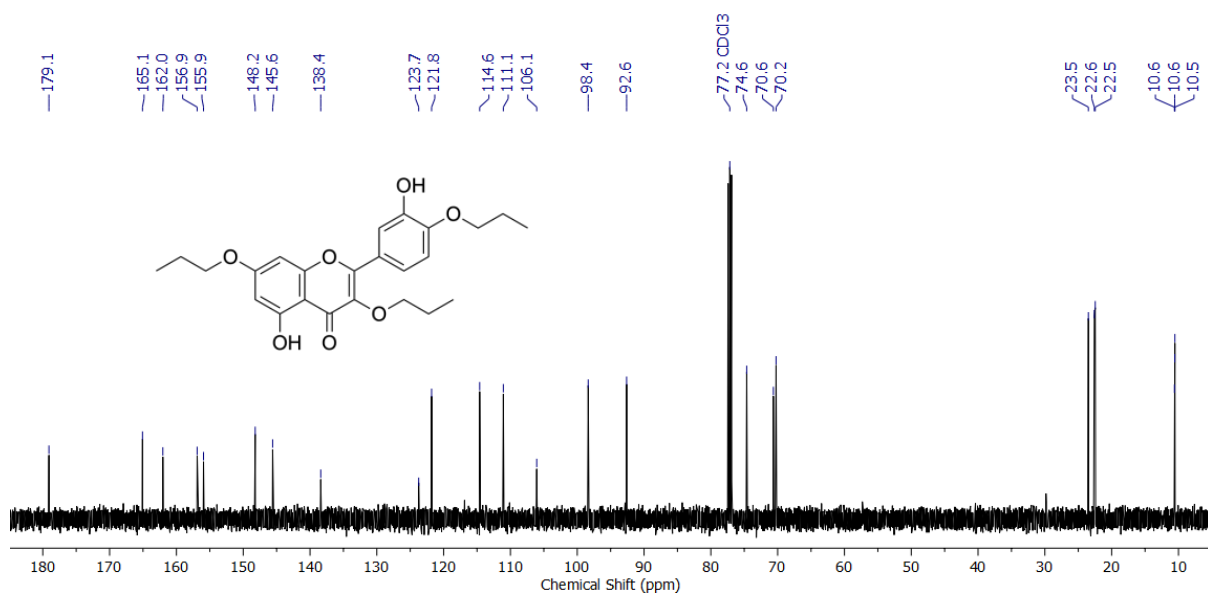

Figure S5. <sup>13</sup>C-NMR spectrum of compound 2b

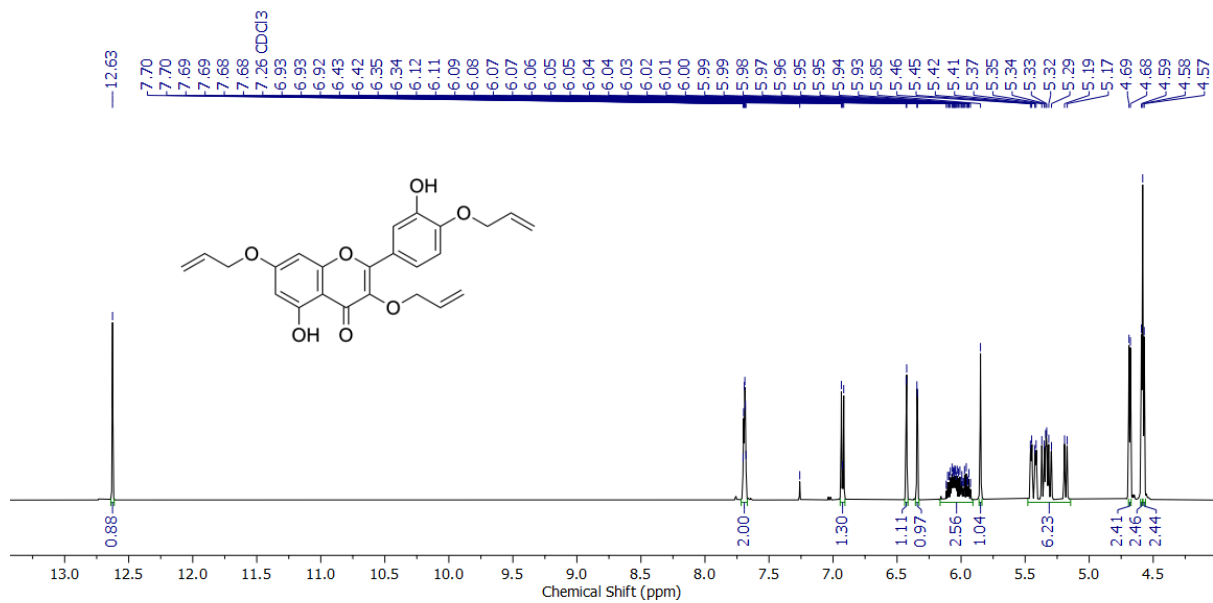

Figure S6.  $^1\text{H-NMR}$  spectrum of compound 2c

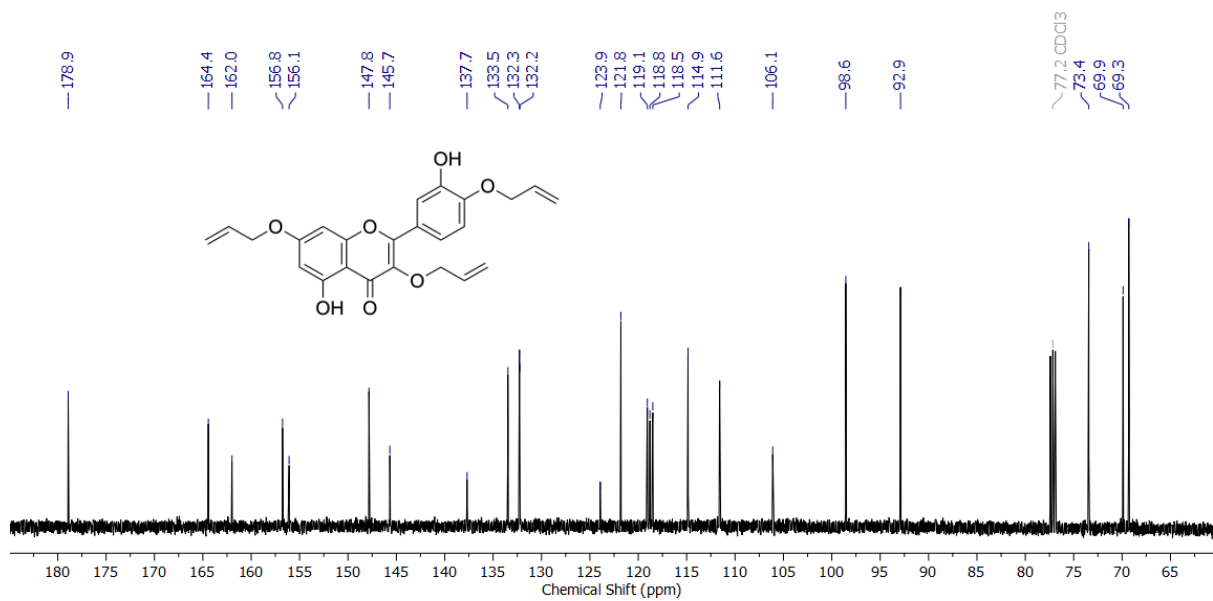

Figure S7.  $^{13}\text{C-NMR}$  spectrum of compound 2c

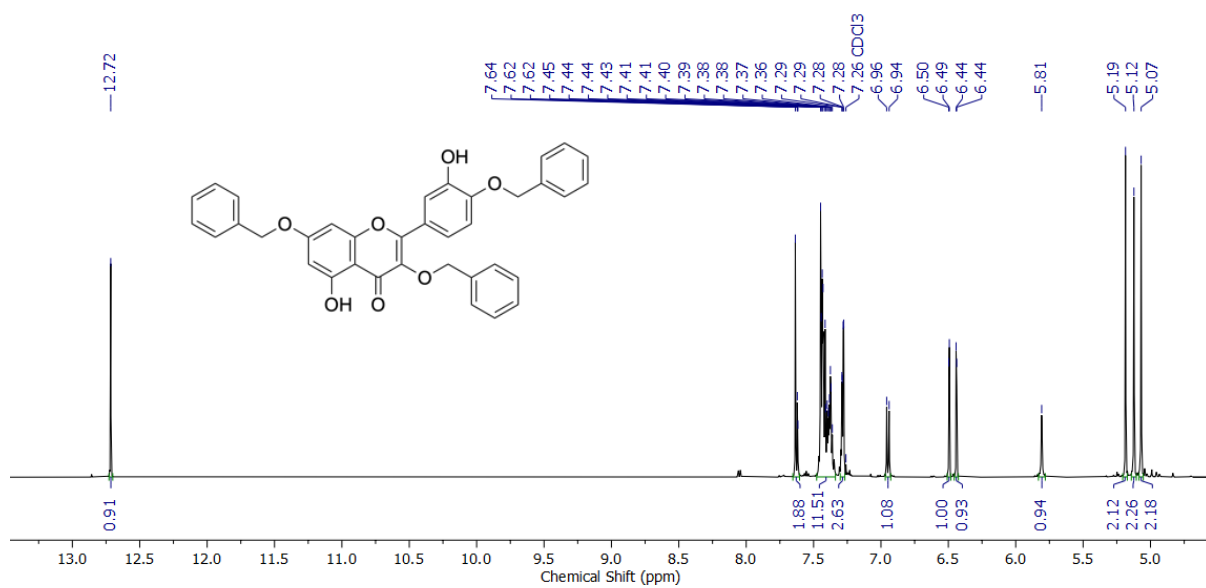

**Figure S8.** <sup>1</sup>H-NMR spectrum of compound 2d

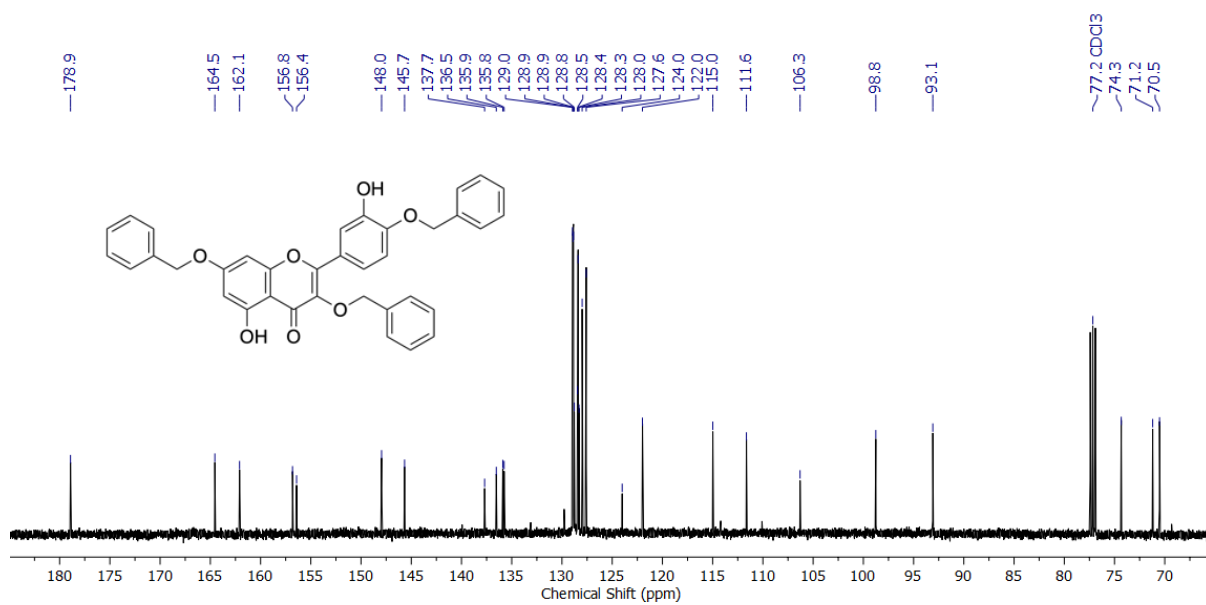

**Figure S9.** <sup>13</sup>C-NMR spectrum of compound 2d

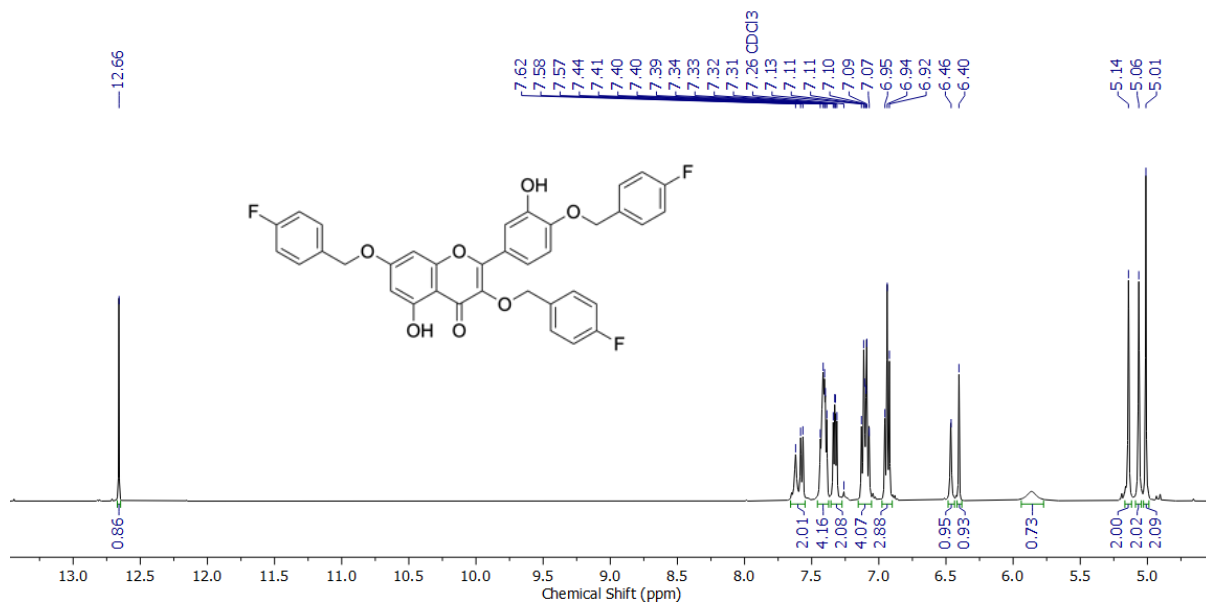

Figure S10. <sup>1</sup>H-NMR spectrum of compound 2e

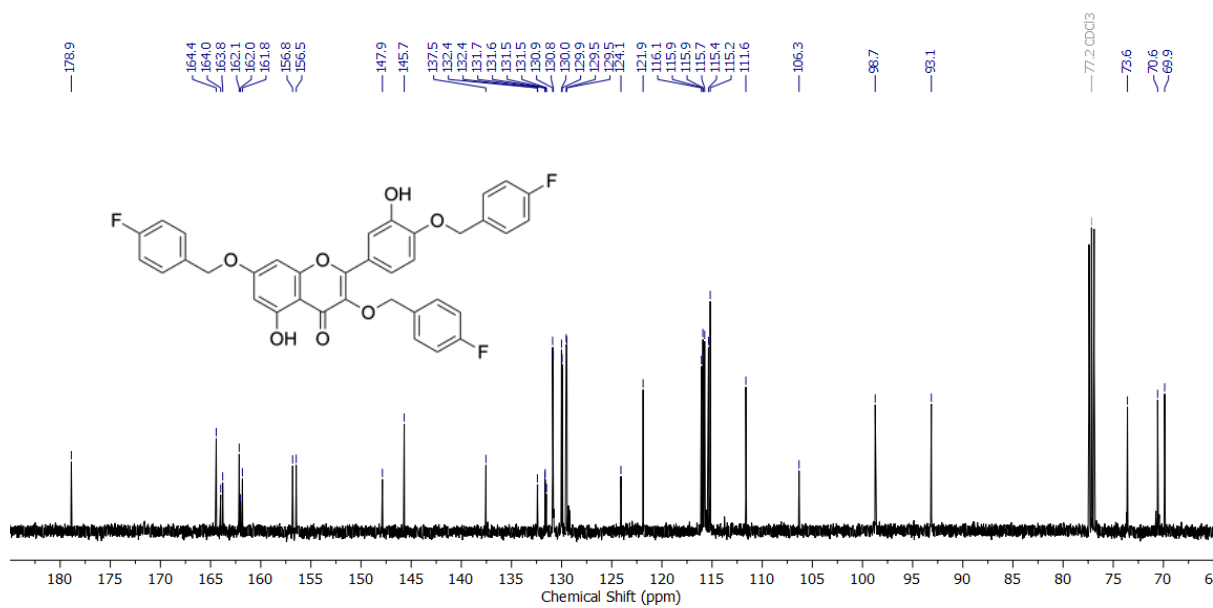

Figure S11. <sup>13</sup>C-NMR spectrum of compound 2e

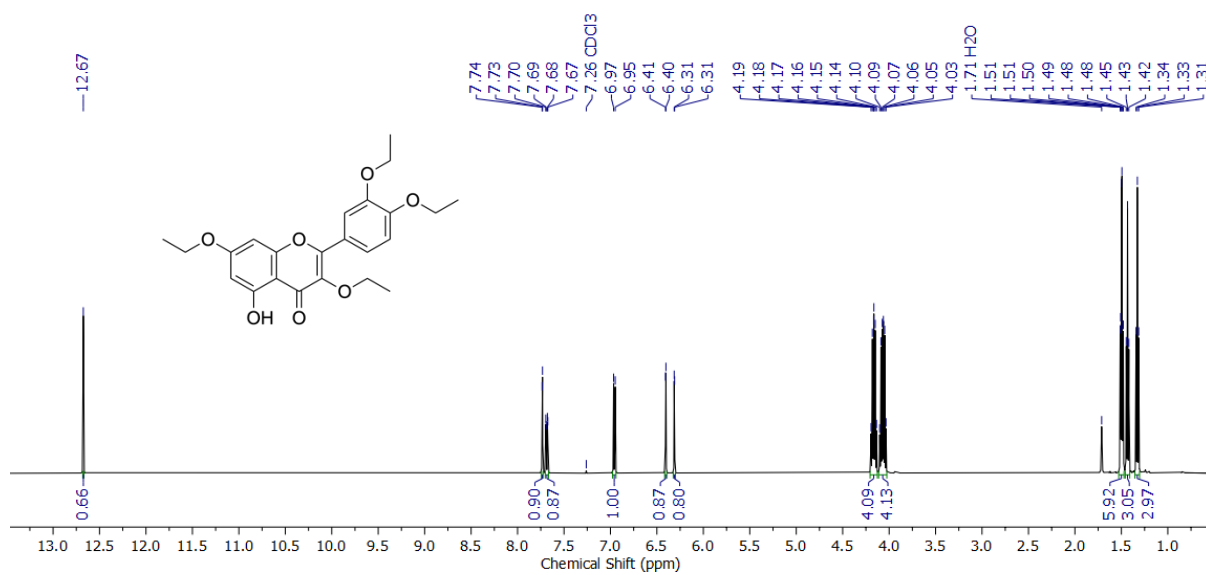

Figure S12. <sup>1</sup>H-NMR spectrum of compound 3a

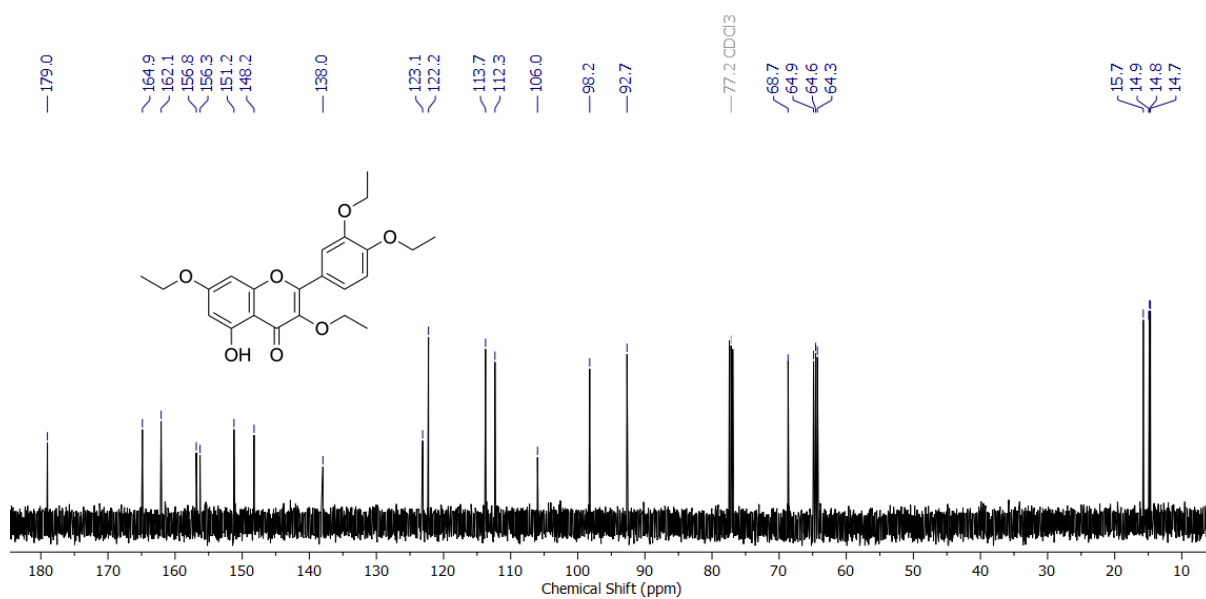

Figure S13. <sup>13</sup>C-NMR spectrum of compound 3a



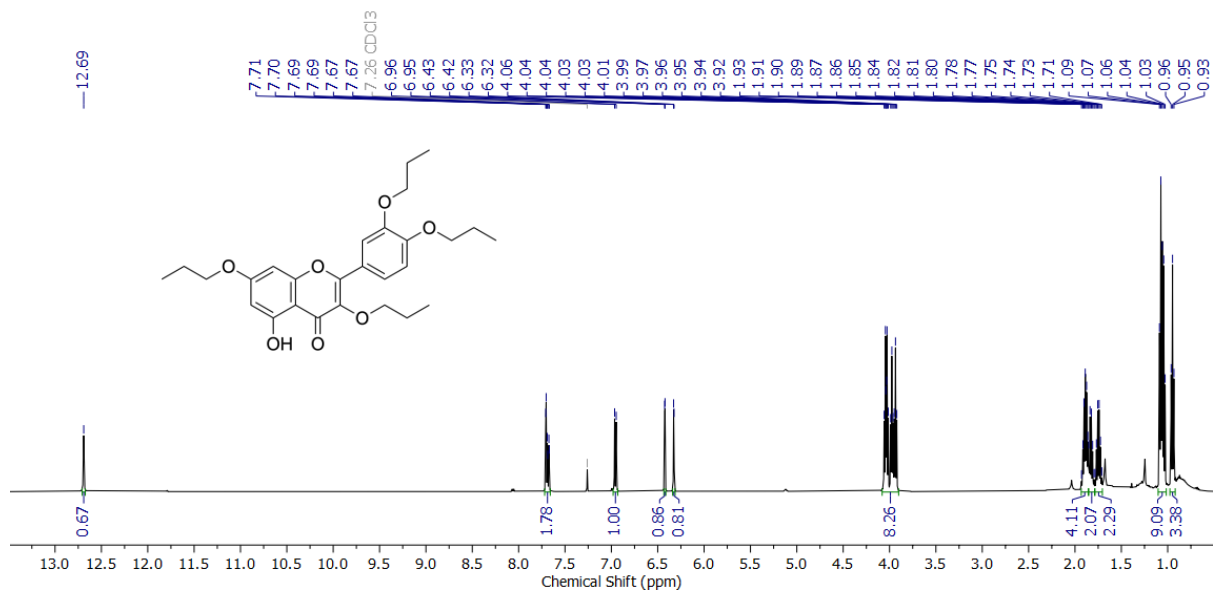

Figure S14. <sup>1</sup>H-NMR spectrum of compound **3b**

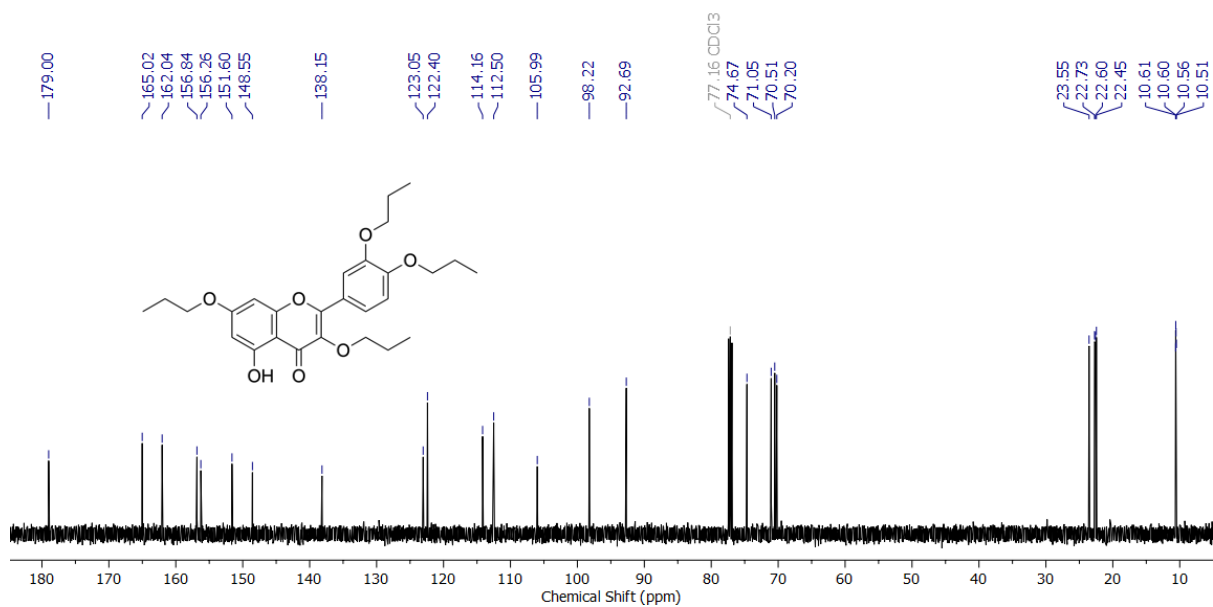

Figure S15. <sup>13</sup>C-NMR spectrum of compound **3b**

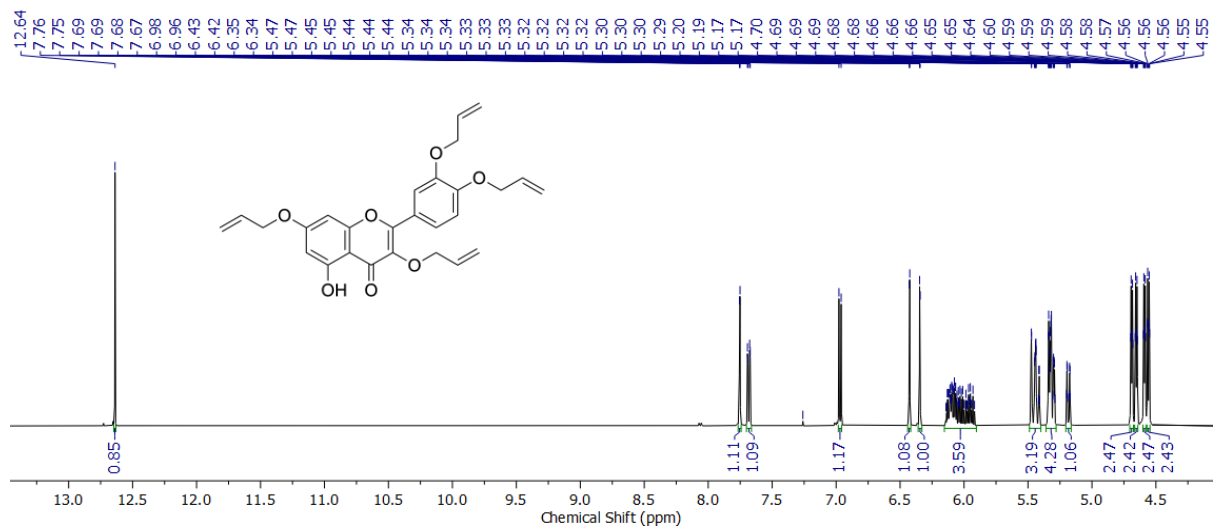

Figure S16. <sup>1</sup>H-NMR spectrum of compound 3c

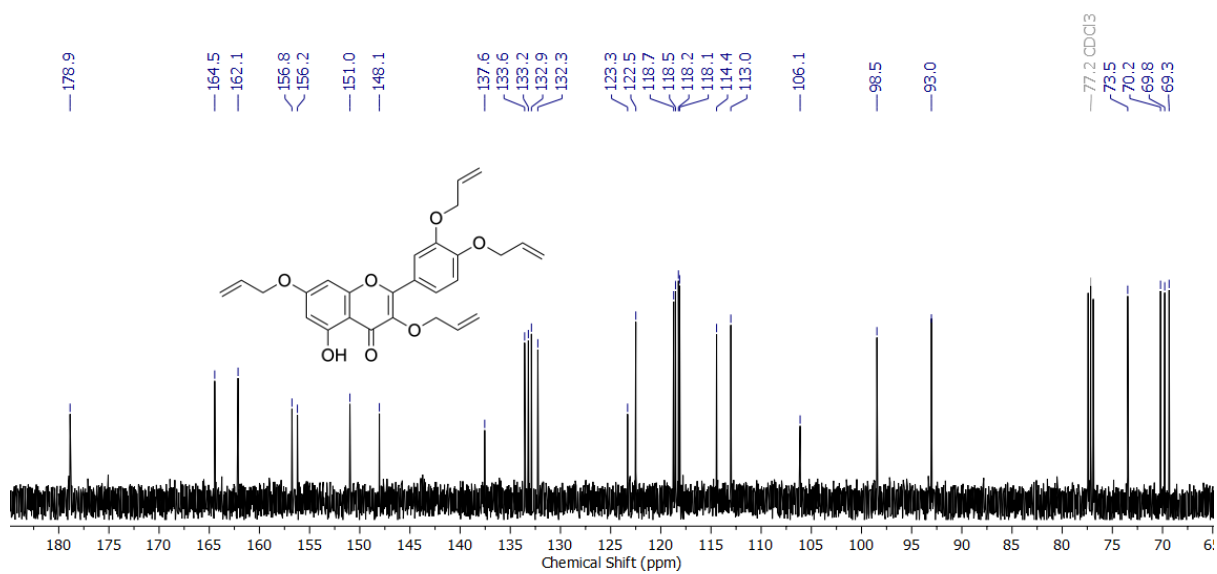

Figure S17. <sup>13</sup>C-NMR spectrum of compound 3c

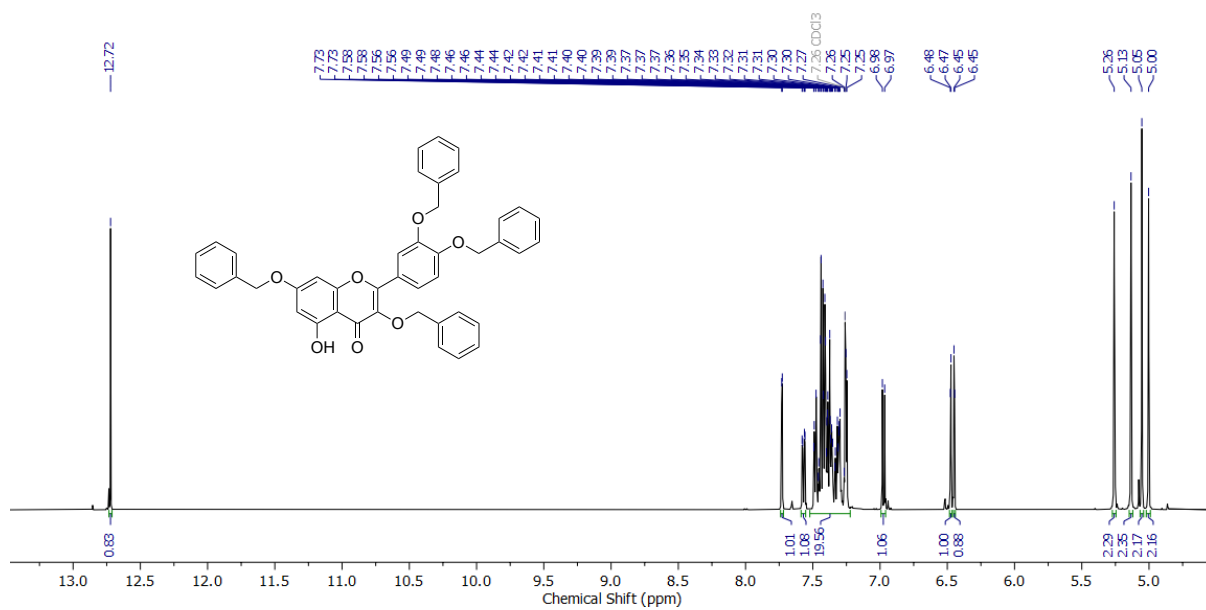

Figure S18.  $^1\text{H-NMR}$  spectrum of compound **3d**

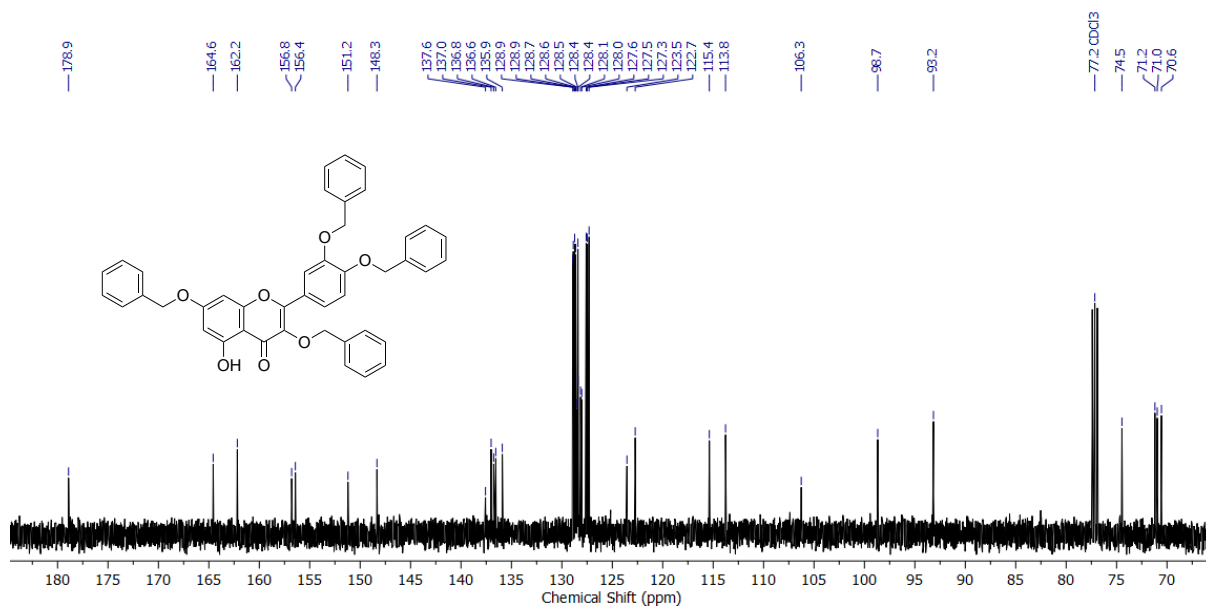

Figure S19.  $^{13}\text{C-NMR}$  spectrum of compound **3d**

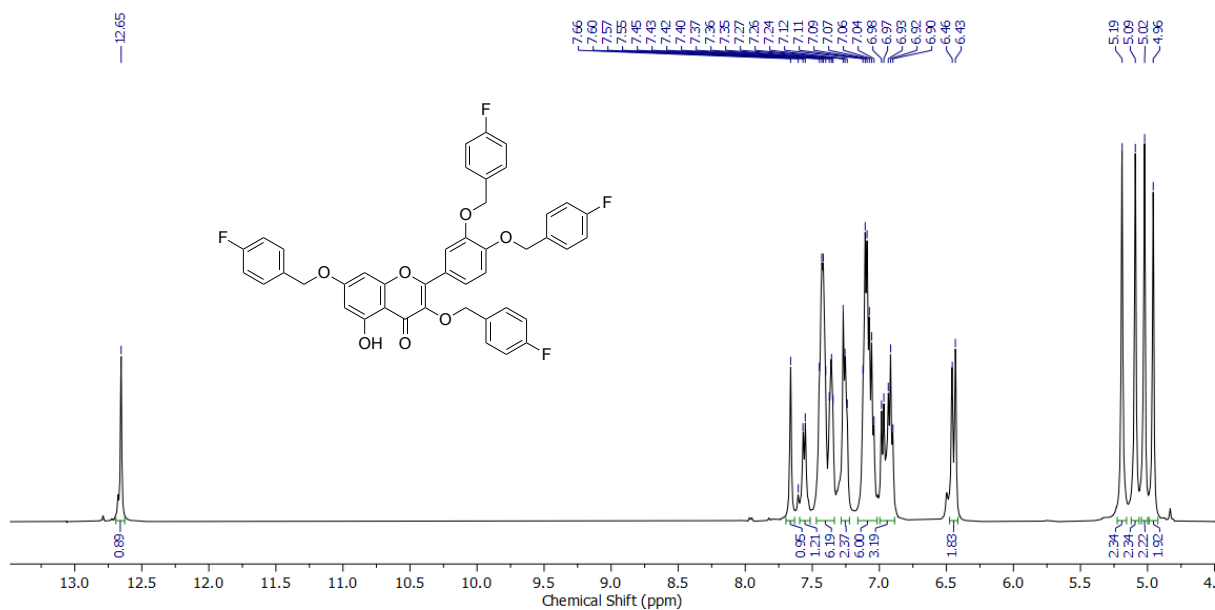

**Figure S20.** <sup>1</sup>H-NMR spectrum of compound **3e**

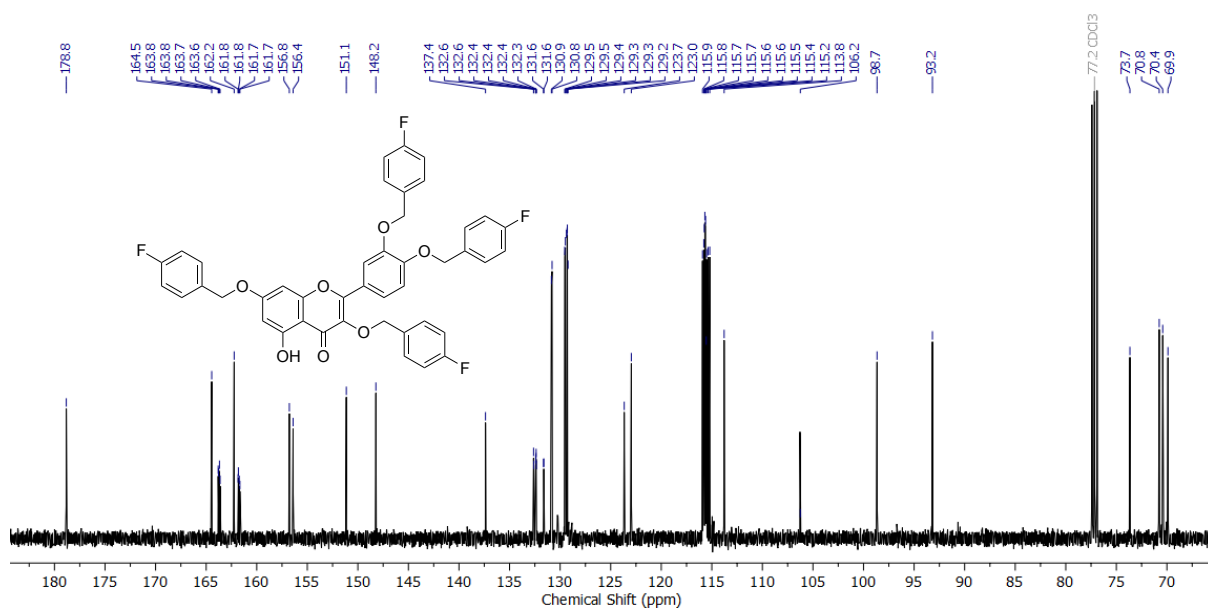

**Figure S21.** <sup>13</sup>C-NMR spectrum of compound **3e**

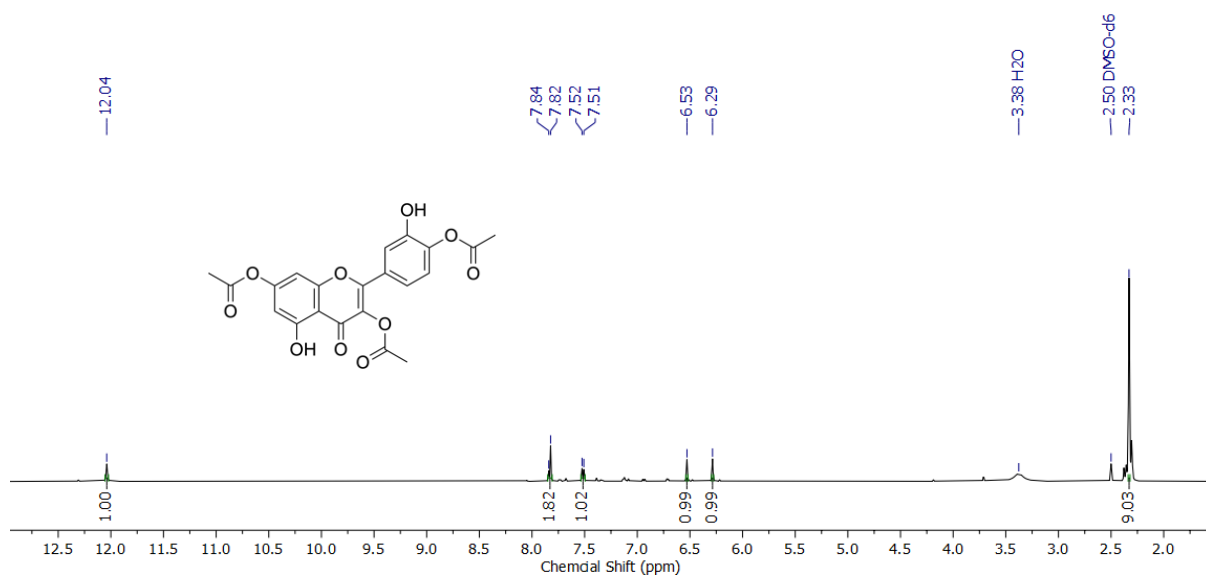

**Figure S22.** <sup>1</sup>H-NMR spectrum of compound 4a

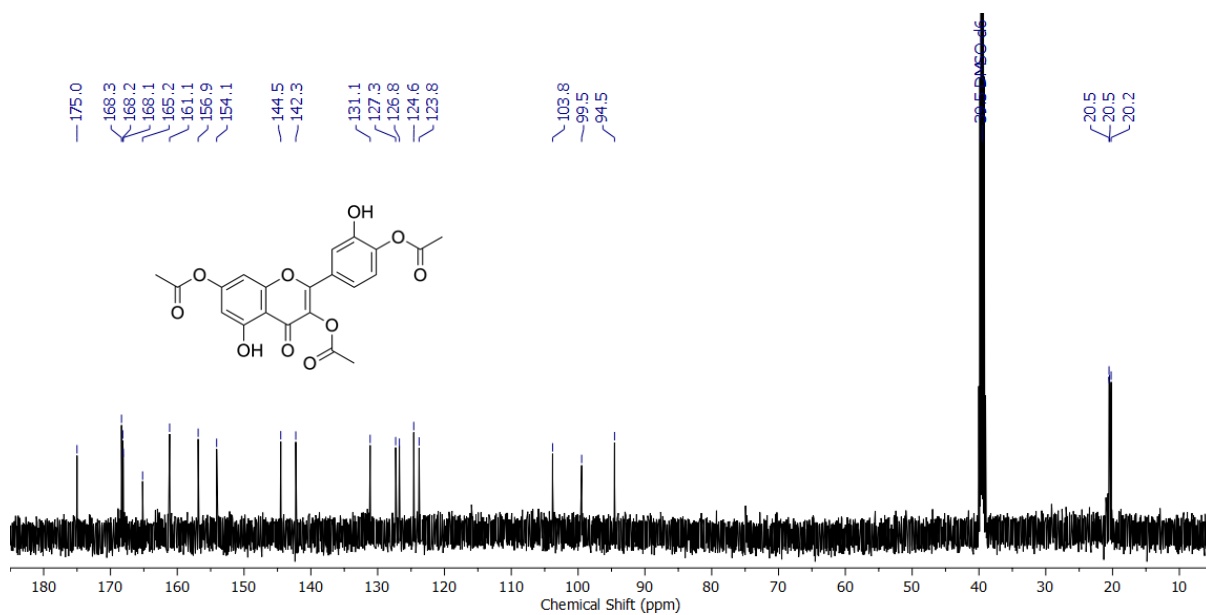

**Figure S23.** <sup>13</sup>C-NMR spectrum of compound 4a

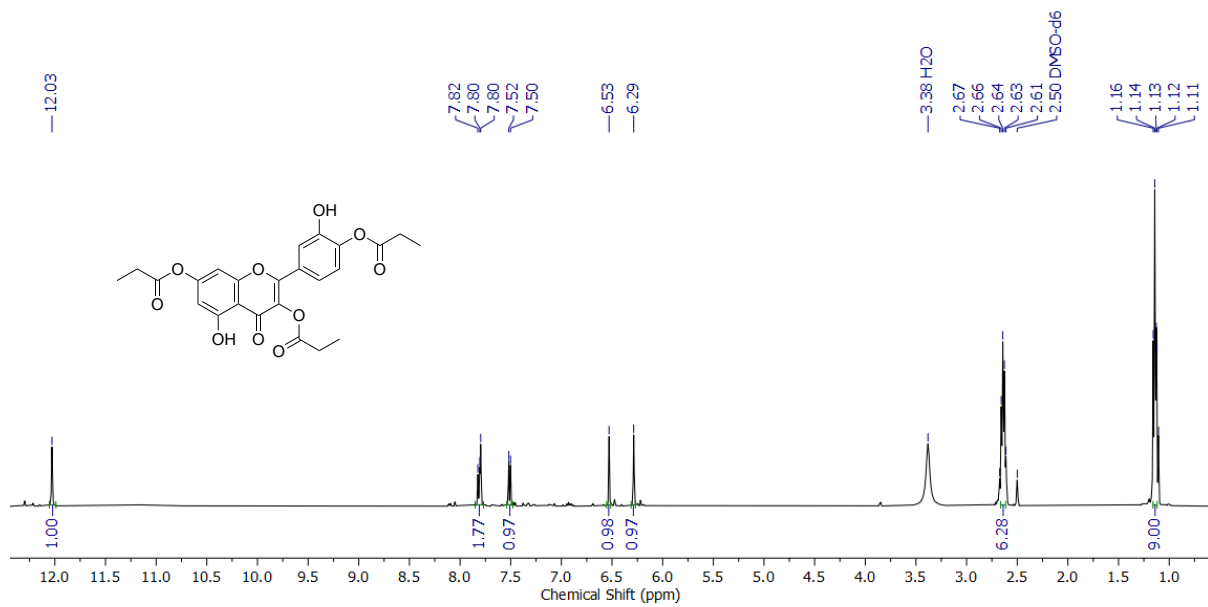

Figure S24. <sup>1</sup>H-NMR spectrum of compound 4b

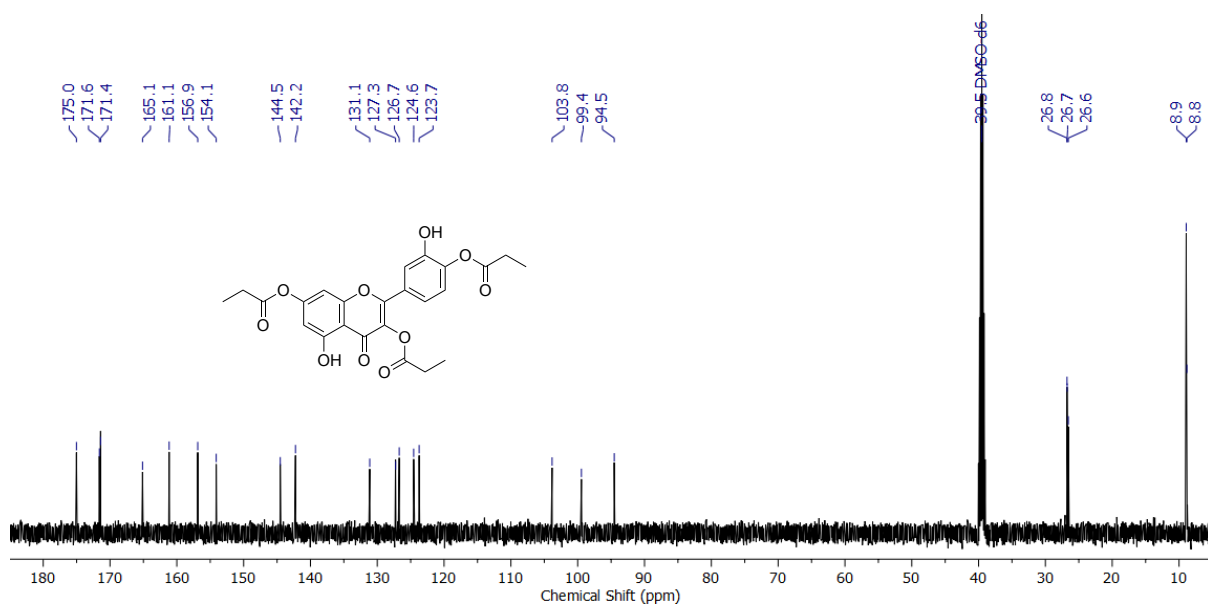

Figure S25. <sup>13</sup>C-NMR spectrum of compound 4b

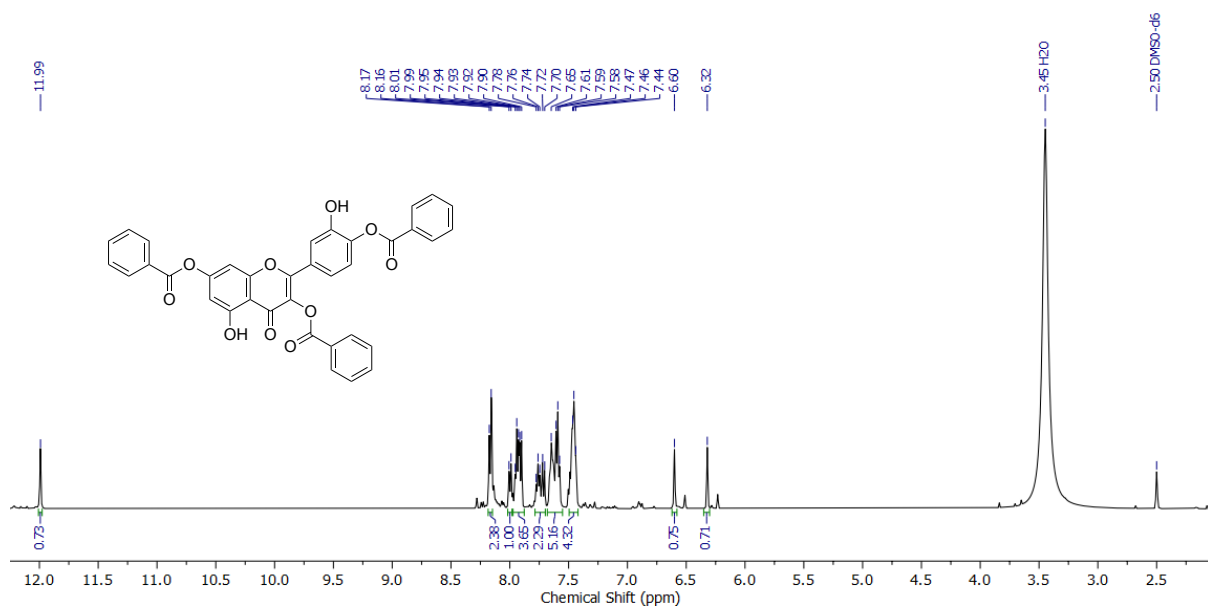

Figure S26. <sup>1</sup>H-NMR spectrum of compound 4c

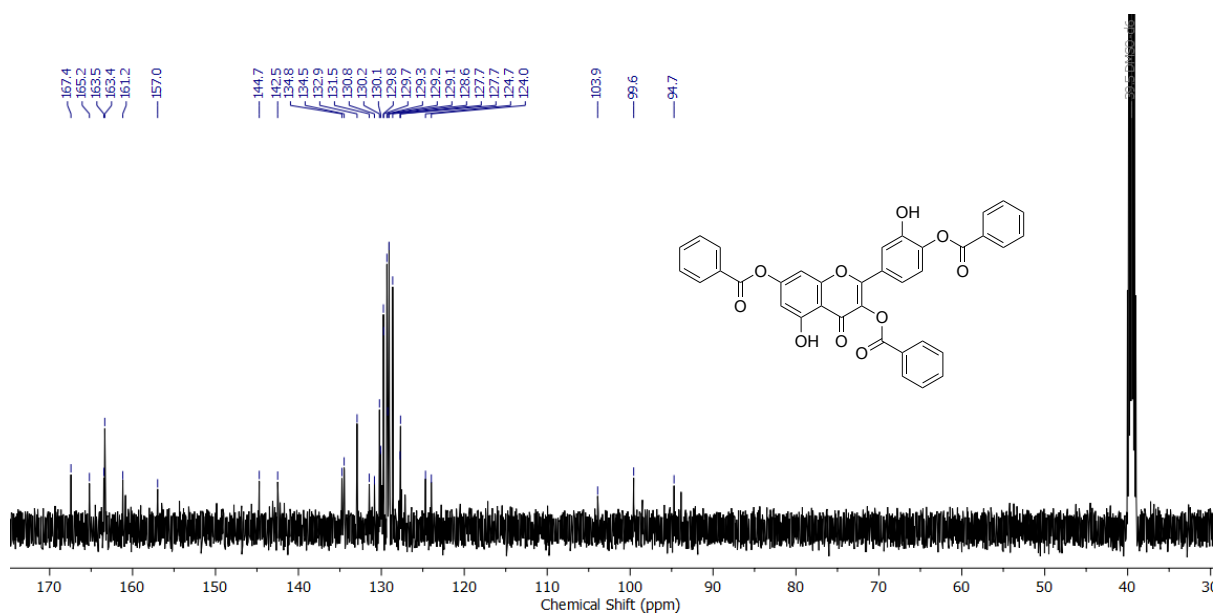

Figure S27. <sup>13</sup>C-NMR spectrum of compound 4c

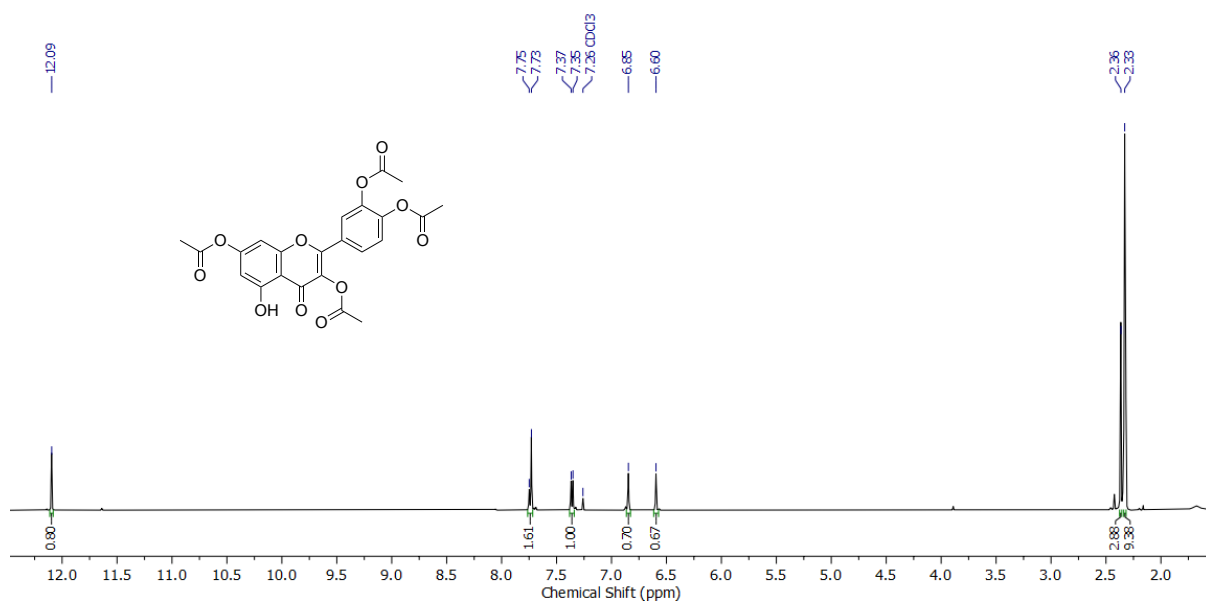

Figure S28. <sup>1</sup>H-NMR spectrum of compound 5a

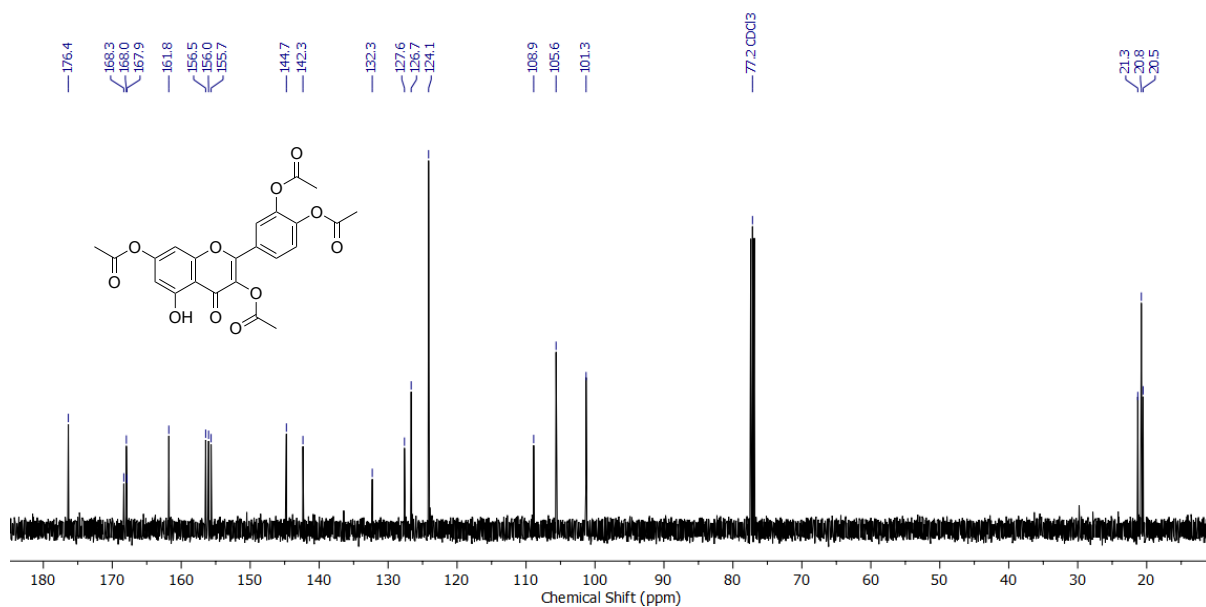

Figure S29. <sup>13</sup>C-NMR spectrum of compound 5a



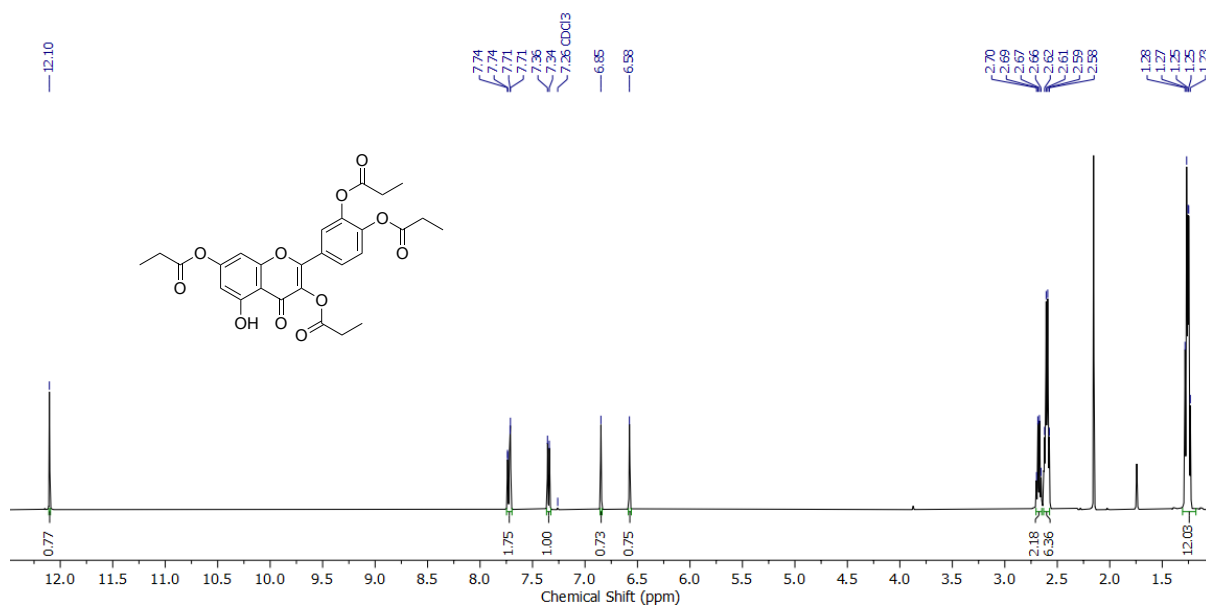

**Figure S30.** <sup>1</sup>H-NMR spectrum of compound **5b**

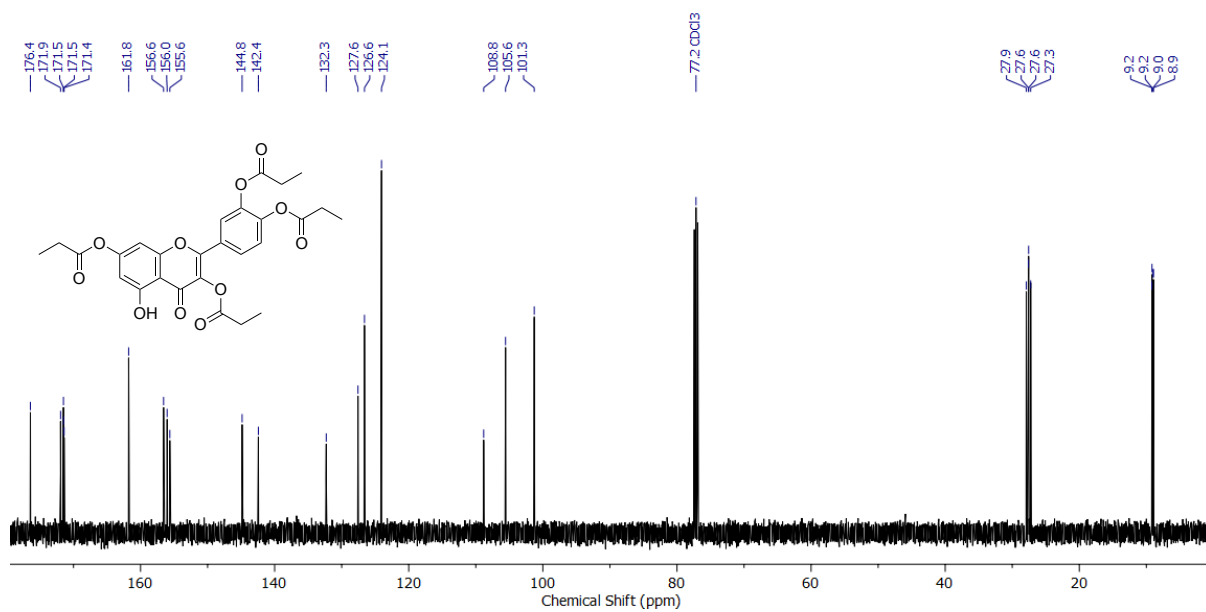

**Figure S31.** <sup>13</sup>C-NMR spectrum of compound **5b**

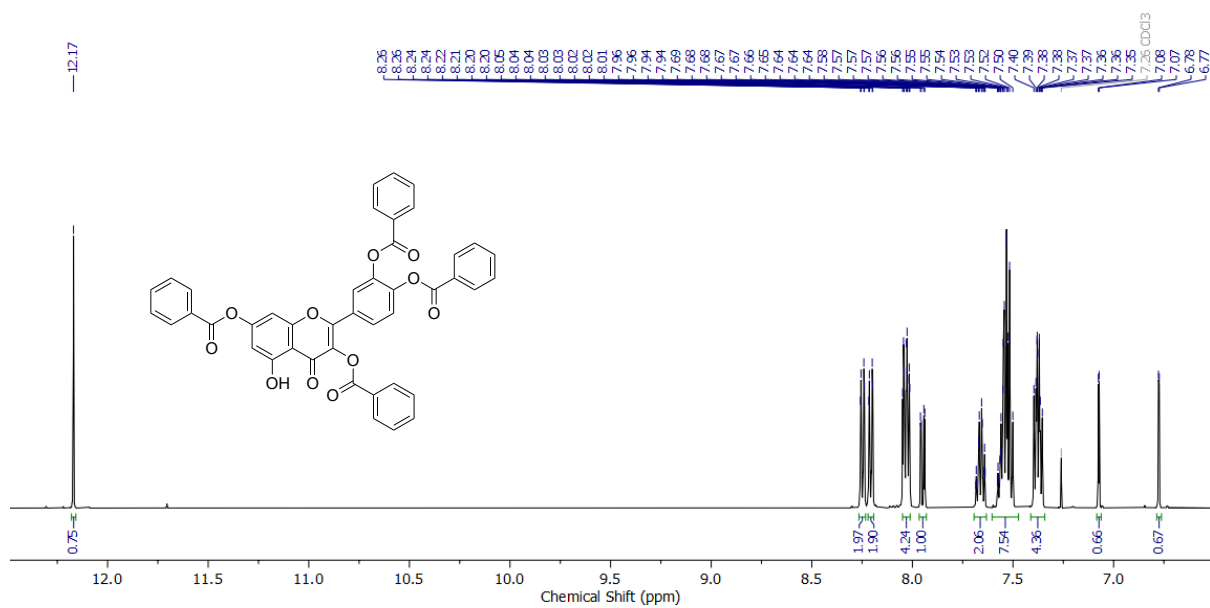

Figure S32.  $^1\text{H}$ -NMR spectrum of compound 5c

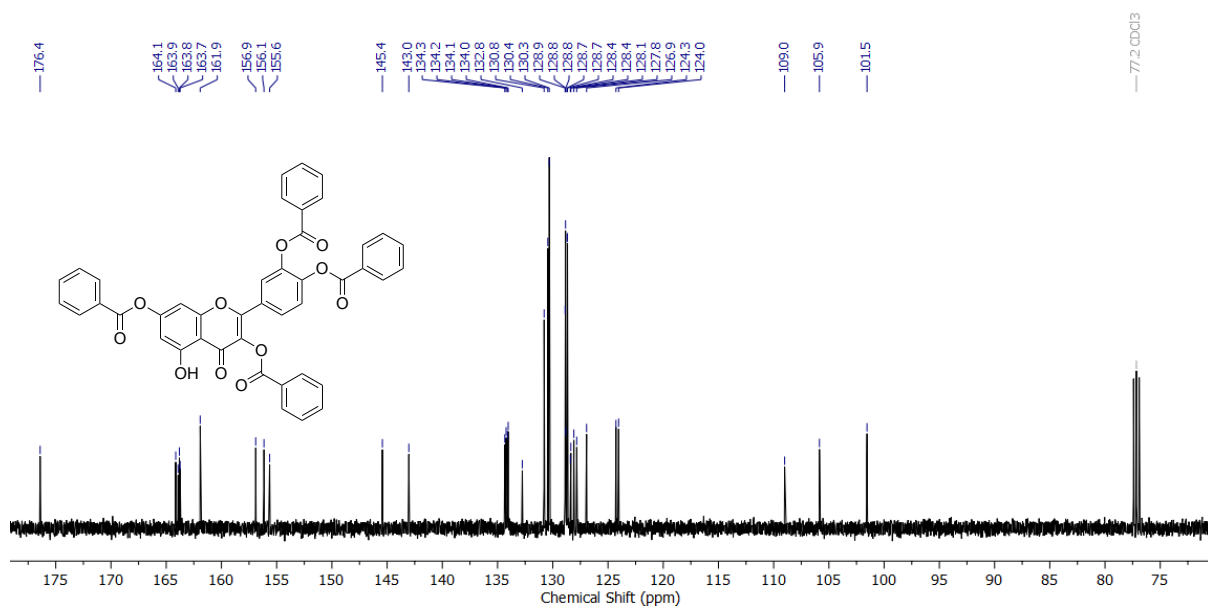

Figure S33.  $^{13}\text{C}$ -NMR spectrum of compound 5c

II. Percent Inhibition of Quercetin and its Derivative Against the SARS-CoV-2 S<sub>1</sub>:ACE2 Interaction

**Table S1.** Summary of the percent inhibition of quercetin and its derivative against the SARS-CoV-2 S<sub>1</sub>:ACE2 interaction

| Concentration (μM)     | Compound 1  |             |             | Concentration (μM)             | Compound 2a        |             |              |
|------------------------|-------------|-------------|-------------|--------------------------------|--------------------|-------------|--------------|
|                        | Trial 1     | Trial 2     | Trial 3     |                                | Trial 1            | Trial 2     | Trial 3      |
| 100                    | 46.34       | -1.61       | 45.38       | 100                            | 109.46             | 71.68       | 108.93       |
| 20                     | 41.09       | 25.23       | 61.11       | 20                             | 115.04             | 96.91       | 108.30       |
| 4                      | 5.44        | -13.15      | 24.79       | 4                              | 112.77             | 100.85      | 105.39       |
| 0.8                    | -13.55      | -40.18      | -0.41       | 0.8                            | 104.08             | 102.82      | 102.86       |
| <b>IC<sub>50</sub></b> | <b>n.d.</b> | <b>n.d.</b> | <b>n.d.</b> | <b>IC<sub>50</sub></b>         | <b>n.d.</b>        | <b>n.d.</b> | <b>n.d.</b>  |
|                        |             |             |             |                                |                    |             |              |
| Concentration (μM)     | Compound 2b |             |             | Concentration (μM)             | Compound 2c        |             |              |
|                        | Trial 1     | Trial 2     | Trial 3     |                                | Trial 1            | Trial 2     | Trial 3      |
| 100                    | 102.40      | 25.06       | 103.59      | 100                            | 115.36             | 57.90       | 95.00        |
| 20                     | 113.09      | 60.67       | 105.92      | 20                             | 113.74             | 88.32       | 103.84       |
| 4                      | 103.31      | 59.33       | 97.43       | 4                              | 107.58             | 112.75      | 108.30       |
| 0.8                    | 87.82       | 71.14       | 94.12       | 0.8                            | 105.96             | 97.72       | 97.86        |
| <b>IC<sub>50</sub></b> | <b>n.d.</b> | <b>n.d.</b> | <b>n.d.</b> | <b>IC<sub>50</sub></b>         | <b>n.d.</b>        | <b>n.d.</b> | <b>n.d.</b>  |
|                        |             |             |             |                                |                    |             |              |
| Concentration (μM)     | Compound 2d |             |             | Concentration (μM)             | Compound 2e        |             |              |
|                        | Trial 1     | Trial 2     | Trial 3     |                                | Trial 1            | Trial 2     | Trial 3      |
| 100                    | 106.93      | 62.46       | 74.41       | 100                            | 54.05              | 73.02       | 47.27        |
| 20                     | 110.50      | 100.22      | 98.88       | 20                             | 43.81              | 57.00       | 44.60        |
| 4                      | 111.41      | 96.38       | 97.96       | 4                              | 29.94              | 54.68       | 4.39         |
| 0.8                    | 102.46      | 92.17       | 79.85       | 0.8                            | -14.71             | 21.83       | -7.94        |
| <b>IC<sub>50</sub></b> | <b>n.d.</b> | <b>n.d.</b> | <b>n.d.</b> | <b>IC<sub>50</sub></b>         | <b>6.99</b>        | <b>1.53</b> | <b>14.03</b> |
|                        |             |             |             | <b>Average IC<sub>50</sub></b> | <b>7.52 ± 6.27</b> |             |              |

| Concentration<br>( $\mu\text{M}$ ) | Compound 3a                       |             |             | Concentration<br>( $\mu\text{M}$ ) | Compound 3b                         |              |             |
|------------------------------------|-----------------------------------|-------------|-------------|------------------------------------|-------------------------------------|--------------|-------------|
|                                    | Trial 1                           | Trial 2     | Trial 3     |                                    | Trial 1                             | Trial 2      | Trial 3     |
| 100                                | 68.63                             | 97.45       | 97.82       | 100                                | 50.68                               | 70.96        | 83.64       |
| 20                                 | 69.41                             | 95.66       | 86.89       | 20                                 | 38.50                               | 48.77        | 65.96       |
| 4                                  | 16.46                             | 58.34       | 59.50       | 4                                  | -17.30                              | 13.96        | 25.90       |
| 0.8                                | -21.52                            | 36.69       | 33.58       | 0.8                                | -70.64                              | -2.15        | 8.72        |
| <b>IC<sub>50</sub></b>             | <b>11.07</b>                      | <b>1.95</b> | <b>1.99</b> | <b>IC<sub>50</sub></b>             | <b>51.30</b>                        | <b>16.75</b> | <b>9.04</b> |
| <b>Average IC<sub>50</sub></b>     | <b>5.00 <math>\pm</math> 5.25</b> |             |             | <b>Average IC<sub>50</sub></b>     | <b>25.70 <math>\pm</math> 22.50</b> |              |             |
| Concentration<br>( $\mu\text{M}$ ) | Compound 3c                       |             |             | Concentration<br>( $\mu\text{M}$ ) | Compound 3d                         |              |             |
|                                    | Trial 1                           | Trial 2     | Trial 3     |                                    | Trial 1                             | Trial 2      | Trial 3     |
| 100                                | 79.52                             | 91.63       | 86.79       | 100                                | 23.83                               | 35.16        | 41.62       |
| 20                                 | 71.22                             | 92.53       | 78.49       | 20                                 | -1.52                               | 15.37        | 10.08       |
| 4                                  | 54.12                             | 77.40       | 49.07       | 4                                  | 4.85                                | 24.15        | 23.48       |
| 0.8                                | -8.49                             | 44.65       | 37.56       | 0.8                                | 21.54                               | 17.24        | 24.03       |
| <b>IC<sub>50</sub></b>             | <b>4.19</b>                       | <b>0.88</b> | <b>1.60</b> | <b>IC<sub>50</sub></b>             | <b>n.d.</b>                         | <b>n.d.</b>  | <b>n.d.</b> |
| <b>Average IC<sub>50</sub></b>     | <b>2.22 <math>\pm</math> 1.74</b> |             |             |                                    |                                     |              |             |
| Concentration<br>( $\mu\text{M}$ ) | Compound 3e                       |             |             | Concentration<br>( $\mu\text{M}$ ) | Compound 4a                         |              |             |
|                                    | Trial 1                           | Trial 2     | Trial 3     |                                    | Trial 1                             | Trial 2      | Trial 3     |
| 100                                | 11.48                             | 23.36       | 63.44       | 100                                | 95.07                               | 70.51        | 92.77       |
| 20                                 | 9.13                              | 66.25       | 32.70       | 20                                 | 94.94                               | 93.51        | 100.83      |
| 4                                  | 19.10                             | 66.36       | 48.42       | 4                                  | 95.46                               | 87.34        | 79.07       |
| 0.8                                | 10.26                             | 4.93        | -3.81       | 0.8                                | 74.34                               | 75.88        | 39.84       |
| <b>IC<sub>50</sub></b>             | <b>n.d.</b>                       | <b>n.d.</b> | <b>n.d.</b> | <b>IC<sub>50</sub></b>             | <b>n.d.</b>                         | <b>n.d.</b>  | <b>n.d.</b> |
|                                    |                                   |             |             | <b>Average IC<sub>50</sub></b>     | <b>3.28 <math>\pm</math> 2.69</b>   |              |             |

| Concentration<br>( $\mu\text{M}$ ) | Compound 4b                       |             |             | Concentration<br>( $\mu\text{M}$ ) | Compound 4c                       |             |             |
|------------------------------------|-----------------------------------|-------------|-------------|------------------------------------|-----------------------------------|-------------|-------------|
|                                    | Trial 1                           | Trial 2     | Trial 3     |                                    | Trial 1                           | Trial 2     | Trial 3     |
| 100                                | 89.37                             | 108.72      | 49.70       | 100                                | 83.08                             | 95.00       | 91.07       |
| 20                                 | 77.12                             | 74.63       | 70.28       | 20                                 | 52.14                             | 83.60       | 83.65       |
| 4                                  | 46.21                             | 68.19       | 43.53       | 4                                  | 41.87                             | 79.00       | 76.57       |
| 0.8                                | -11.28                            | 46.62       | 3.91        | 0.8                                | 36.92                             | 50.35       | 36.73       |
| <b>IC<sub>50</sub></b>             | <b>6.27</b>                       | <b>1.05</b> | <b>2.51</b> | <b>IC<sub>50</sub></b>             | <b>n.d.</b>                       | <b>n.d.</b> | <b>n.d.</b> |
| <b>Average IC<sub>50</sub></b>     | <b>3.28 <math>\pm</math> 2.69</b> |             |             |                                    |                                   |             |             |
| Concentration<br>( $\mu\text{M}$ ) | Compound 5a                       |             |             | Concentration<br>( $\mu\text{M}$ ) | Compound 5b                       |             |             |
|                                    | Trial 1                           | Trial 2     | Trial 3     |                                    | Trial 1                           | Trial 2     | Trial 3     |
| 100                                | 38.86                             | 59.62       | 54.34       | 100                                | 68.77                             | 66.25       | 63.14       |
| 20                                 | 49.72                             | 79.22       | 64.42       | 20                                 | 46.79                             | 71.60       | 95.84       |
| 4                                  | 56.10                             | 73.25       | 58.74       | 4                                  | 61.12                             | 106.23      | 94.26       |
| 0.8                                | 62.54                             | 33.20       | 45.74       | 0.8                                | 46.75                             | 56.43       | 82.68       |
| <b>IC<sub>50</sub></b>             | <b>n.d.</b>                       | <b>n.d.</b> | <b>n.d.</b> | <b>IC<sub>50</sub></b>             | <b>n.d.</b>                       | <b>n.d.</b> | <b>n.d.</b> |
|                                    |                                   |             |             |                                    |                                   |             |             |
| Concentration<br>( $\mu\text{M}$ ) | Compound 5c                       |             |             | Concentration<br>( $\mu\text{M}$ ) | Erythrosine B                     |             |             |
|                                    | Trial 1                           | Trial 2     | Trial 3     |                                    | Trial 1                           | Trial 2     | Trial 3     |
| 100                                | 7.48                              | 10.22       | -1.10       | 100                                | 105.37                            | 106.16      | 102.84      |
| 20                                 | 15.93                             | 26.07       | 12.49       | 20                                 | 95.97                             | 97.97       | 82.98       |
| 4                                  | 8.61                              | 7.35        | 5.76        | 4                                  | 47.26                             | 52.91       | 51.82       |
| 0.8                                | 8.74                              | -18.80      | -1.37       | 0.8                                | 10.11                             | -18.41      | -7.67       |
| <b>IC<sub>50</sub></b>             | <b>n.d.</b>                       | <b>n.d.</b> | <b>n.d.</b> | <b>IC<sub>50</sub></b>             | <b>5.49</b>                       | <b>6.63</b> | <b>6.33</b> |
|                                    |                                   |             |             | <b>Average IC<sub>50</sub></b>     | <b>6.16 <math>\pm</math> 0.59</b> |             |             |

Not determined (n.d.): compounds that did not exhibit a dose-dependent inhibition at the working concentration range (0.8 – 100  $\mu\text{M}$ )

### III. Raw Data of the Toxicity Profiles of the O-Modified Quercetin Derivatives

**Table S2.** Criteria for the cytotoxicity summary

| <b>Cytotoxicity Conclusion</b> | <b>Criteria</b>                                                                                                                                                |
|--------------------------------|----------------------------------------------------------------------------------------------------------------------------------------------------------------|
| <b>Safe</b>                    | Cytotoxicity is < 10% in 3 out of 3 trials, or<br>Cytotoxicity is < 10% in 2 out of 3 trials, and the cytotoxicity mean $\pm$ SEM across all 3 trials is < 10% |
| <b>Equivocal</b>               | Cytotoxicity is < 10% in 2 out of 3 trials, but the cytotoxicity mean $\pm$ SEM across all 3 trials is $\geq$ 10%                                              |
| <b>Flagged</b>                 | Cytotoxicity is $\geq$ 10% in at least 2 out of 3 trials                                                                                                       |

**Table S3.** Hepatotoxicity of sample compounds at their respective bioactive concentrations in HepG2 cells

| <b>Sample</b>        | <b>Concentration (ppm)</b> | <b>Cytotoxicity (%)</b> |                |                | <b>Cytotoxicity</b> |
|----------------------|----------------------------|-------------------------|----------------|----------------|---------------------|
|                      |                            | <b>Trial 1</b>          | <b>Trial 2</b> | <b>Trial 3</b> |                     |
| <b>Quercetin (1)</b> | 30.22                      | < 0                     | 1.23           | 3.99           | Safe                |
| <b>2e</b>            | 4.71                       | < 0                     | 1.21           | < 0            | Safe                |
| <b>3a</b>            | 2.07                       | 0.81                    | 1.53           | 2.06           | Safe                |
| <b>3b</b>            | 12.09                      | 1.17                    | < 0            | < 0            | Safe                |
| <b>3c</b>            | 1.03                       | < 0                     | < 0            | < 0            | Safe                |
| <b>4b</b>            | 1.54                       | < 0                     | 0.63           | < 0            | Safe                |

**Table S4.** Nephrotoxicity of sample compounds at their respective bioactive concentrations in HK-2 cells

| <b>Sample</b>        | <b>Concentration (ppm)</b> | <b>Cytotoxicity (%)</b> |                |                | <b>Cytotoxicity</b> |
|----------------------|----------------------------|-------------------------|----------------|----------------|---------------------|
|                      |                            | <b>Trial 1</b>          | <b>Trial 2</b> | <b>Trial 3</b> |                     |
| <b>Quercetin (1)</b> | 30.22                      | 4.18                    | < 0            | 0.50           | Safe                |
| <b>2e</b>            | 4.71                       | 1.72                    | < 0            | 2.15           | Safe                |
| <b>3a</b>            | 2.07                       | 9.06                    | 3.13           | 4.32           | Safe                |
| <b>3b</b>            | 12.09                      | 0.73                    | 2.43           | 1.97           | Safe                |
| <b>3c</b>            | 1.03                       | < 0                     | 0.12           | < 0            | Safe                |
| <b>4b</b>            | 1.54                       | 0.54                    | < 0            | 0.24           | Safe                |

**Table S5.** Cardiotoxicity of sample compounds at their respective bioactive concentrations in H9c2 cells

| Sample               | Concentration (ppm) | Cytotoxicity (%) |         |         | Cytotoxicity |
|----------------------|---------------------|------------------|---------|---------|--------------|
|                      |                     | Trial 1          | Trial 2 | Trial 3 |              |
| <b>Quercetin (1)</b> | 30.22               | 0.47             | 32.23   | 6.57    | Equivocal    |
| <b>2e</b>            | 4.71                | 2.03             | < 0     | 1.61    | Safe         |
| <b>3a</b>            | 2.07                | 0.33             | < 0     | < 0     | Safe         |
| <b>3b</b>            | 12.09               | 0.15             | < 0     | 2.99    | Safe         |
| <b>3c</b>            | 1.03                | 0.47             | < 0     | 5.02    | Safe         |
| <b>4b</b>            | 1.54                | < 0              | < 0     | 5.85    | Safe         |
